# Supplementary material
Source: PubMed Central journal article supplement (PMC3390881)
Supplement: 1204686109_pnas.201204686SI.pdf [file 1204686109_pnas.201204686SI.pdf]

# Supporting Information

Kolano et al. 10.1073/pnas.1204686109

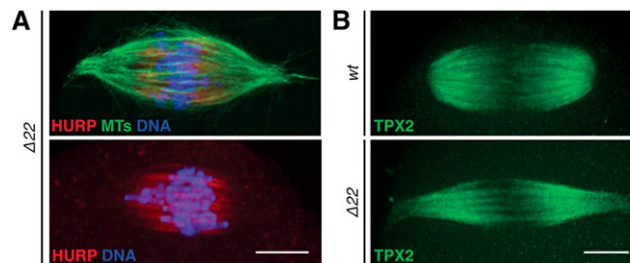

**Fig. S1.** Functional NuMA is required for polar but not central spindle organization. (A) HURP is localized properly in the central spindle of  $\Delta 22$  oocytes. MI oocytes were labeled with HURP (red), tubulin (green), and DNA (blue). HURP has the expected localization in the central spindle region. (B) TPX2 labeling extends to spindle extremities. MI oocytes from *wt* (Upper) or  $\Delta 22$  (Lower) oocytes were labeled for TPX2.

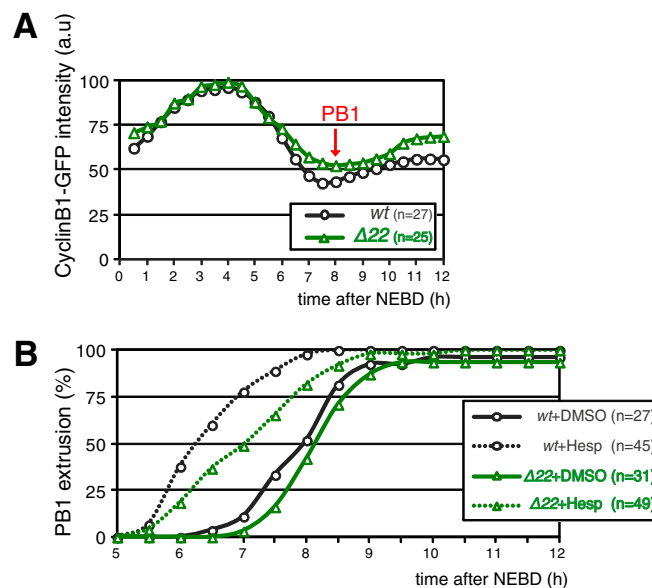

**Fig. S2.** Cyclin B1-GFP is degraded at anaphase I with identical kinetics in control vs.  $\Delta 22$  oocytes. (A) Graph shows the kinetics of cyclin B1-GFP accumulation during meiotic maturation in control (gray) vs.  $\Delta 22$  (green) oocytes. The fluorescence intensity of cyclin B1-GFP in each condition was normalized to the maximum intensity reached at NEBD + 4 h. The red arrow indicates the time of PB1. (B) Treatment with hesperadin, an Aurora B/C inhibitor, accelerates the extrusion of PB1 more efficiently in controls (gray) compared to  $\Delta 22$  oocytes (green). Hesperadin (100 nM) was added at NEBD + 4 h, and oocytes were scored for PB1. Mutant oocytes are advanced after hesperadin treatment: The mean time of PB1 is 6 h and 40 min  $\pm$  40 min for *wt* oocytes (gray dotted line) and 7 h and 20 min  $\pm$  1 h for  $\Delta 22$  oocytes (green dotted line) treated with hesperadin compared to 8 h and 20 min  $\pm$  1 h and 50 min for *wt* oocytes and 8 h and 40 min  $\pm$  1 h and 20 min for  $\Delta 22$  oocytes treated with DMSO. The difference in mean PB1 timing was extremely significant ( $P < 0.0001$ ) between controls and hesperadin-treated oocytes, and the difference between *wt* and  $\Delta 22$  oocytes treated with hesperadin was very significant ( $P = 0.0013$ ).



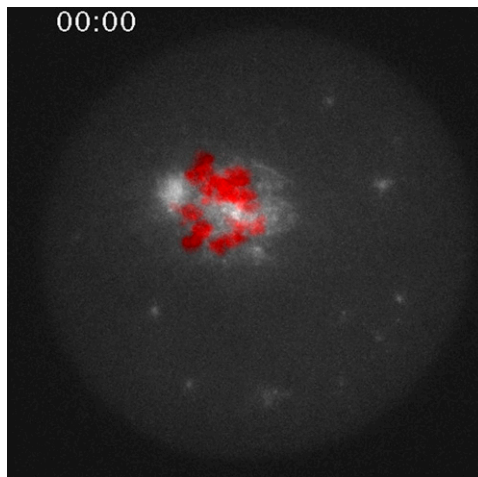

**Movie S2.** Chaotic spindle assembly in a  $\Delta 22$  oocyte. Time-lapse microscopic analysis shows a live  $\Delta 22$  oocyte that expresses EB3-GFP (gray) and H2B-RFP (red) starting from NEBD. Maximal Z-projections of six confocal sections are shown (Z-step = 3  $\mu\text{m}$ ). Time in hours and minutes (h:min) after NEBD is shown. Acquisitions were taken every 30 min.

[Movie S2](#)

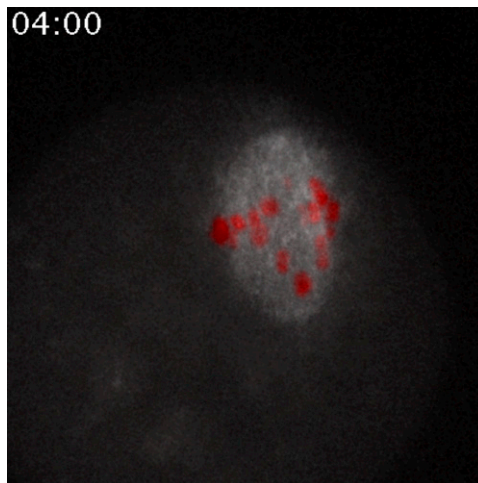

**Movie S3.** Mid-MI and extrusion of PB1 in a *wt* oocyte. Time-lapse microscopic analysis shows a live *wt* oocyte that expresses EB3-GFP (gray) and H2B-RFP (red). The movie starts from NEBD + 4 h. Maximal Z-projections of seven confocal sections taken every 3  $\mu\text{m}$  are shown. Time in hours and minutes (h:min) after NEBD is shown. Acquisitions were taken every 20 min.

[Movie S3](#)

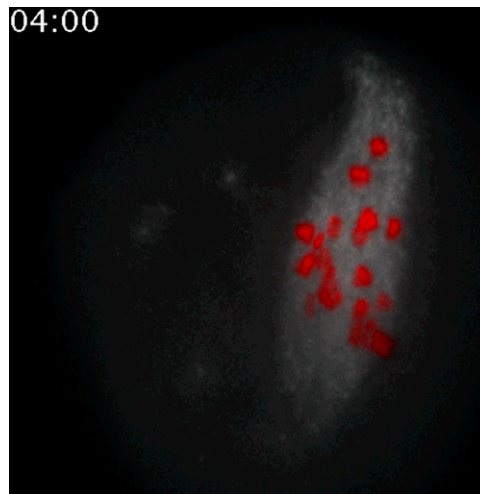

**Movie S4.** Rescue of spindle morphology defects and extrusion of PB1 in a  $\Delta 22$  oocyte. Time-lapse microscopic analysis shows a live  $\Delta 22$  oocyte that is expressing EB3-GFP (gray) and H2B-RFP (red). The movie starts from NEBD + 4 h. Maximal Z-projections of seven confocal sections taken every 3  $\mu\text{m}$  are shown. Time in hours and minutes (h:min) after NEBD is shown. Acquisitions were taken every 20 min.

[Movie S4](#)

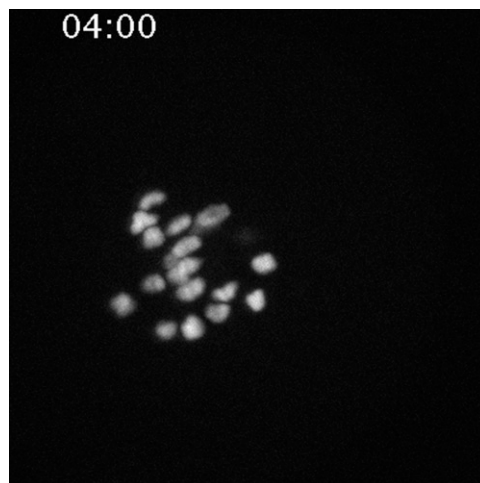

**Movie S5.** Chromosome segregation in a *wt* oocyte. Time-lapse microscopic analysis shows a live control oocyte expressing H2B-RFP (gray) from mid-MI (NEBD + 4 h) until PB1 extrusion. Maximal Z-projections of seven confocal sections are shown (Z-step = 3  $\mu\text{m}$ ). Time in hours and minutes (h:min) after NEBD is shown. Acquisitions were taken every 20 min.

[Movie S5](#)

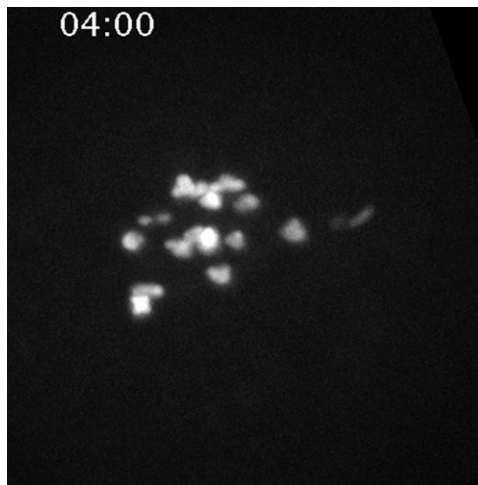

**Movie S6.** Lagging chromosomes in a  $\Delta 22$  oocyte. Time-lapse microscopic analysis shows a live  $\Delta 22$  oocyte expressing H2B-RFP (gray) from mid-MI (NEBD + 4 h) until PB1 extrusion. Maximal Z-projections of seven confocal sections are shown (Z-step = 3  $\mu\text{m}$ ). Time in hours and minutes (h:min) after NEBD is shown. Acquisitions were taken every 20 min.

[Movie S6](#)
